# Supplementary material
Source: Springer Nature journal article supplement (https://www.springermedizin.de/resource/supplementary/12943_2008_351_MOESM5_ESM.pdf/9553990)

MDA-MB-468/Neo MDA-MB-468/Smac

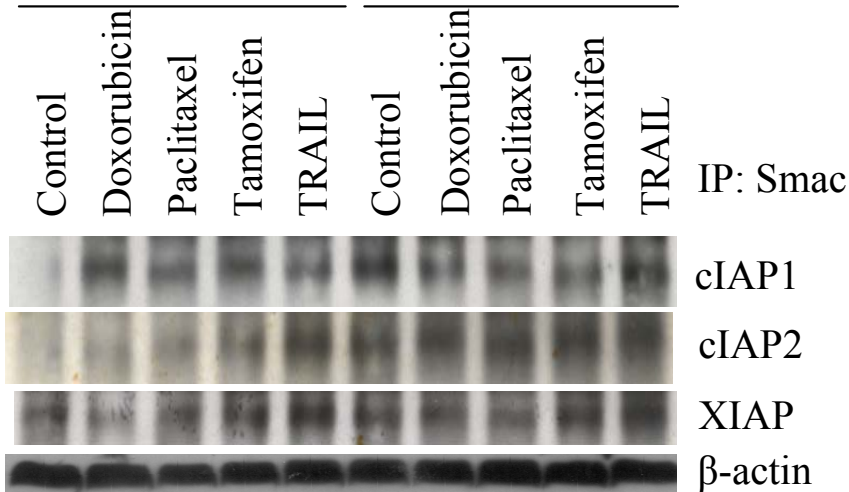

Supplement: MOESM5 [file 9553990]
